# Supplementary material for: A mitochondria targetable near-infrared fluorescence probe for glutathione visual biological detection
Source: Royal Society of Chemistry journal article supplement (doi:10.1039/d1ra08917j), 2022-01-01
Supplement: d1ra08917j1.pdf [file d1ra08917j1.pdf]

## Supporting Information

### **A mitochondria targetable near-infrared fluorescence probe for GSH visual biological detection**

Mingxuan Jia <sup>a</sup>, Liangnian Wei <sup>b</sup>, Yuxun Lu <sup>a</sup>, Ruqiu Zhang <sup>c,d</sup>, Qiuling Chen <sup>a</sup>, Wenjing Xia <sup>c,d</sup>, Ye Liu <sup>b</sup>, Fan Li <sup>d</sup> and Ying Zhou <sup>a\*</sup>

<sup>a</sup> College of Chemical Science and Technology, Yunnan University, Kunming 650091, P. R. China.

<sup>b</sup> Institute of Medical Biology, Chinese Academy of Medical Sciences and Peking Union Medical College, Kunming, Yunnan 650000, P. R. China.

<sup>c</sup> School of Basic Medical Sciences, Kunming Medical University, Kunming 650500, P. R. China.

<sup>d</sup> Department of Pathology and Pathophysiology, Medical College, Yunnan University, Kunming 650091, P. R. China.

Email address: [yingzhou@ynu.edu.cn](mailto:yingzhou@ynu.edu.cn)

## **Table of contents**

- 1. Characterization of probe JGP**
- 2. ESI-MS test for mechanism of the reaction between JGP and GSH**
- 3. Time-dependent fluorescence intensity test of probe JGP to GSH**
- 4. pH Test**
- 5. MTT Cytotoxicity Experiment**

# 1. Characterization of probe JGP

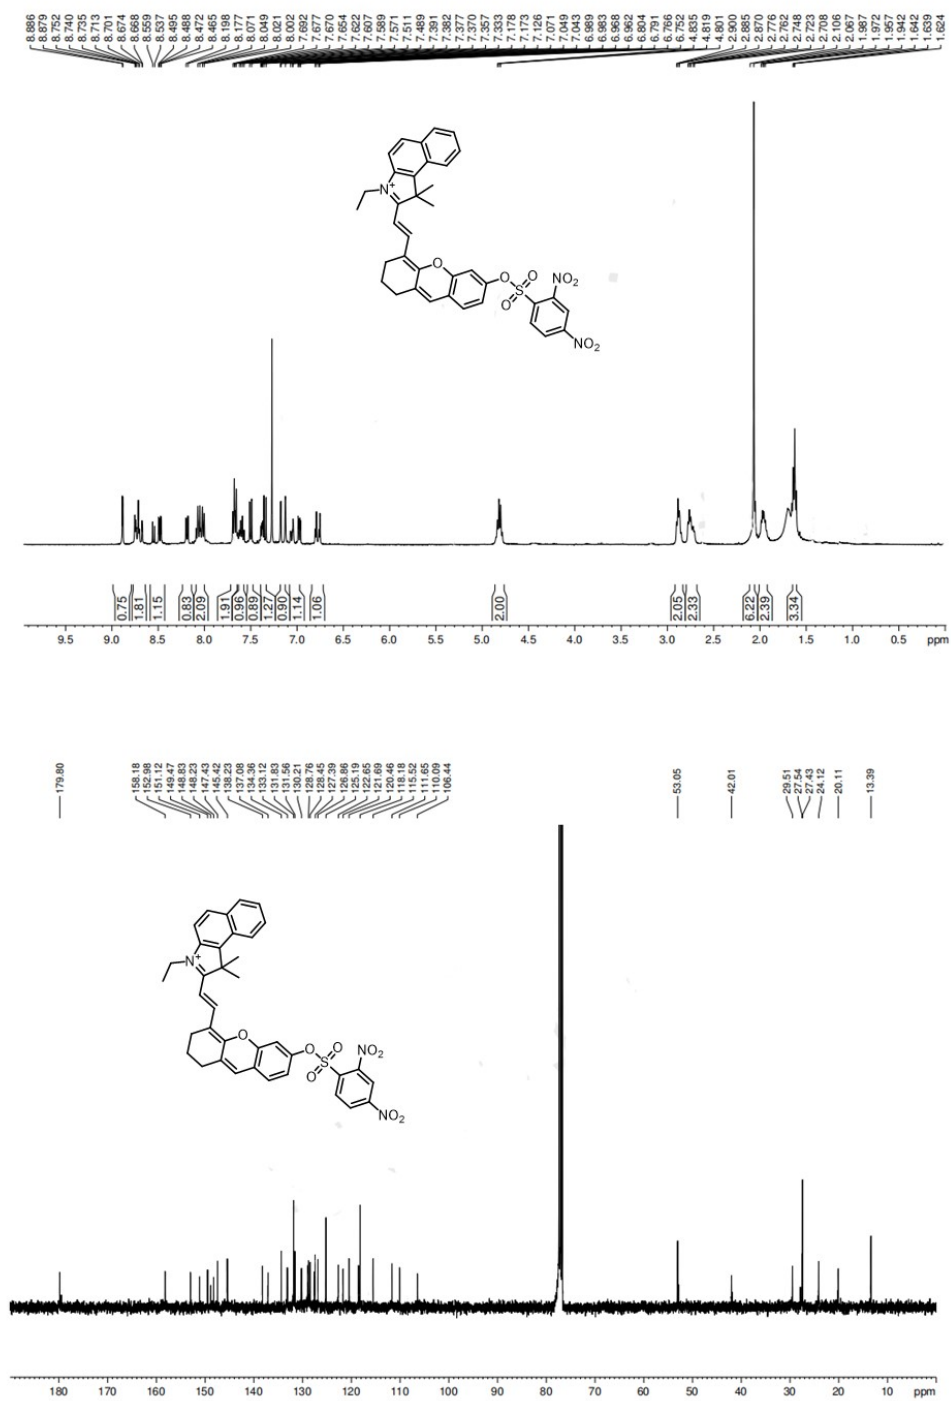

Fig. S1.  $^1\text{H}$  NMR and  $^{13}\text{C}$  NMR spectrum of JGP ( $\text{CDCl}_3$ ).

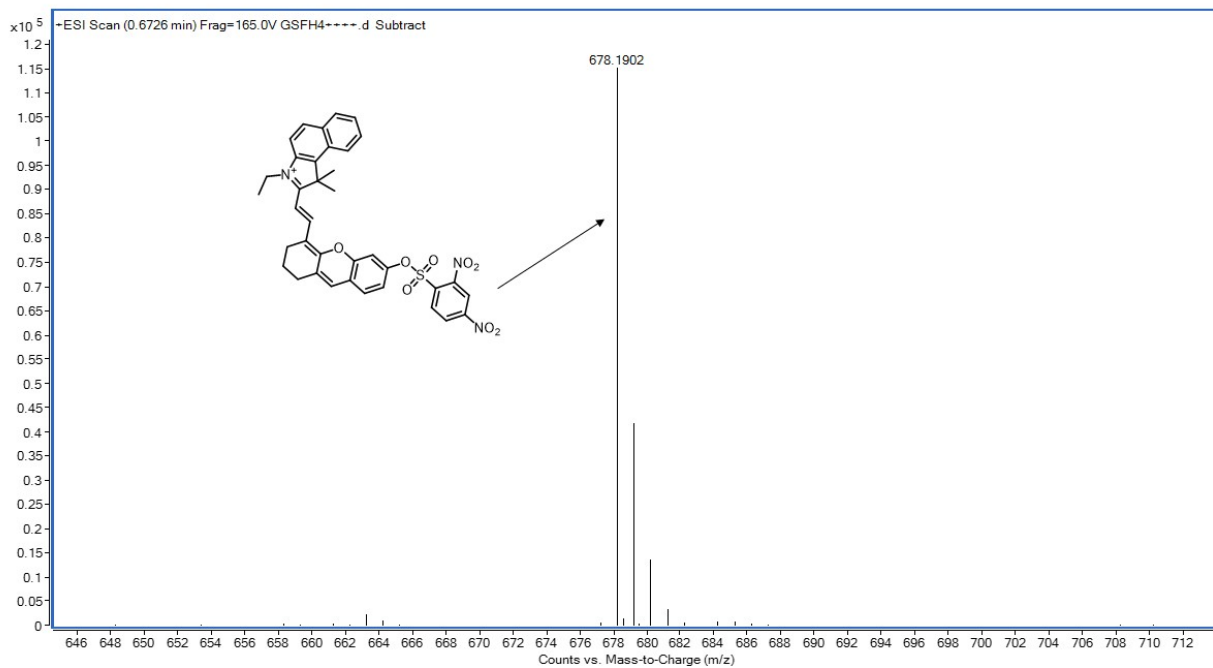

**Fig. S2.** HRMS-ESI spectrum of **JGP**.

## 2. ESI-MS test for mechanism of the reaction between JGP and GSH

JGP was dissolved in a phosphate buffer ( $\text{CH}_3\text{CH}_2\text{OH}:\text{PBS}$ , V:V=7.3, pH=7.4) and final concentration of JGP was 10  $\mu\text{M}$ . Glutathione solution was added in to the solvent system (final concentration of GSH was 20  $\mu\text{M}$ ). After reacting for 5min, the reaction solvent was carried out for HRMS-ESI test (positive ion mode) without any further purification.

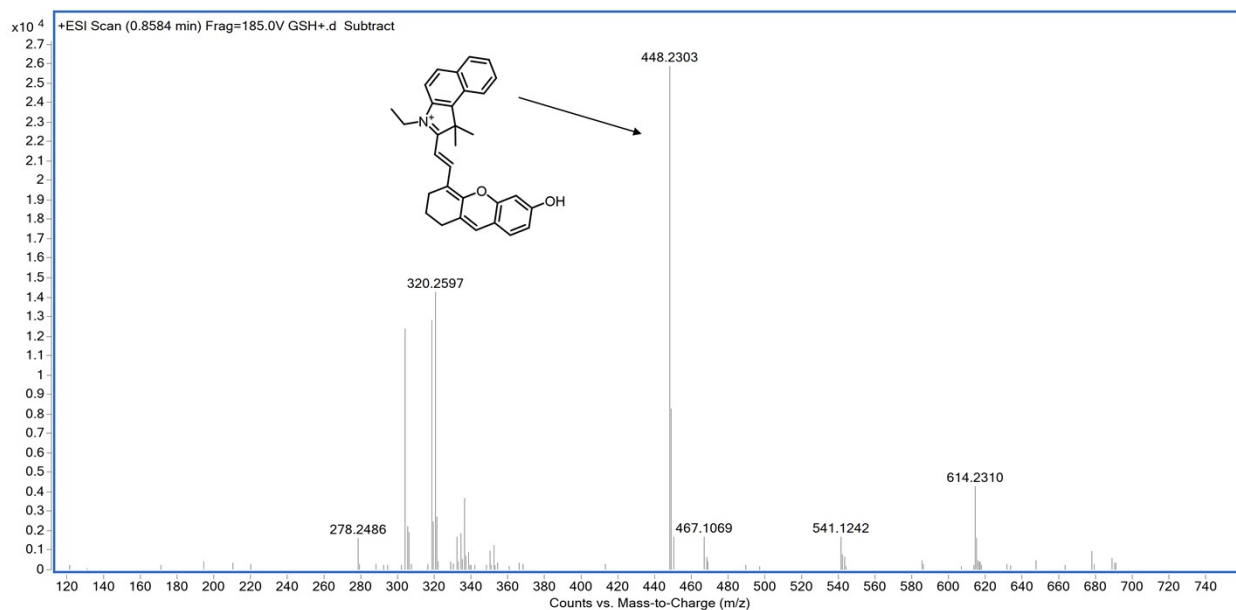

**Fig. S3.** HRMS-ESI spectrum of the reaction result between JGP and GSH.

### 3. Time-dependent fluorescence intensity test of probe JGP to GSH

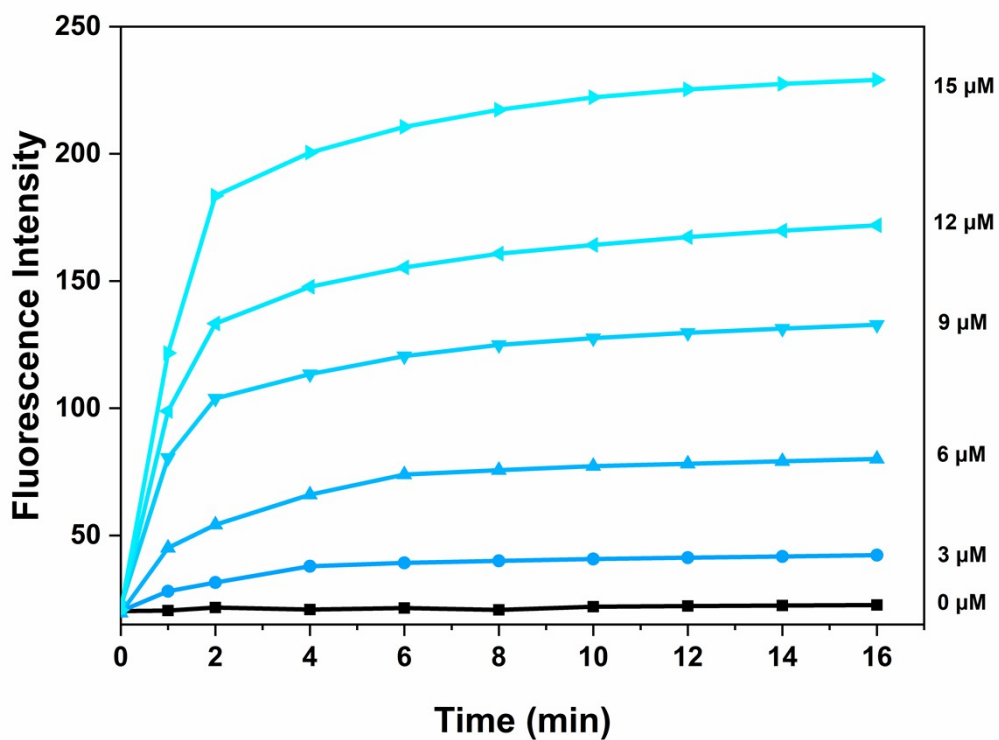

**Fig. S4.** Time-dependent fluorescence intensity of probe JGP (20 μM) after the addition of different concentration of GSH (0, 3, 6, 9, 12, and 15 μM) in PBS buffer (5mL, pH 7.4) ( $\lambda_{\text{ex}}=680$  nm,  $\lambda_{\text{em}}=730$  nm).

#### 4. pH Test

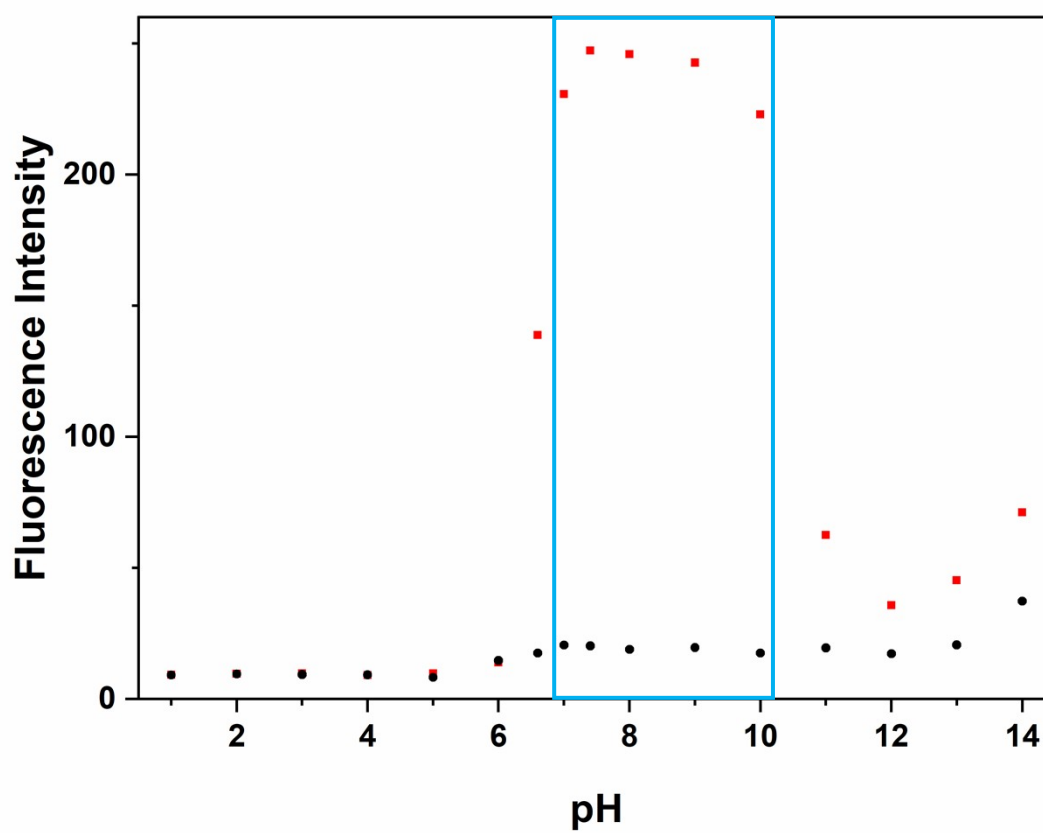

**Fig. S5.** pH effects on fluorescence intensity of probe **JGP** (dark points, 20 μM) and probe **JGP** (20 μM) + GSH (red squares, GSH concentration=15 μM). ( $\lambda_{\text{ex}}$ =680 nm,  $\lambda_{\text{em}}$ =730 nm; reaction time: 5min).

## 5. MTT Cytotoxicity Experiment

HL-60 (leukemia cells) A-549 (lung cancer cells), SMMC-7721 (hepatoma cells), MCF-7 (breast cancer cells), SW-480 (human colon cancer cells), and BEAS-2B (human normal lung epithelial cells) were formulated into single-cell suspensions in culture medium (DMEM) containing 10 % fetal bovine serum. Then the prepared cell suspension was inoculated into 96 well plates at 4000 cells per well. The volume of the culture medium per well was 100  $\mu$ L. The adherent cells were inoculated for 12 to 24 h in advance. JGP dissolved in DMSO was added to the wells to get a concentration gradient (1.25, 2.5, 5 and 10  $\mu$ M) and a final volume of 200  $\mu$ L (three control groups for each treatment). After culturing for 24 h at 37  $^{\circ}$ C, the cultured cells adhered. Then 20  $\mu$ L of 3-(4, 5-dimethylthiazol-2-yl)-5-(3-carboxymethoxyphenyl)-2-(4-sulfophenyl)-2H-tetrazolium (MTS) solution and 100  $\mu$ L of the culture solution were added to each well, and three blank wells were set as the control groups. In order to make the reaction complete, the plate was incubated for 2-4 h and then tested by a multifunction microplate reader (MULTISKANFC).

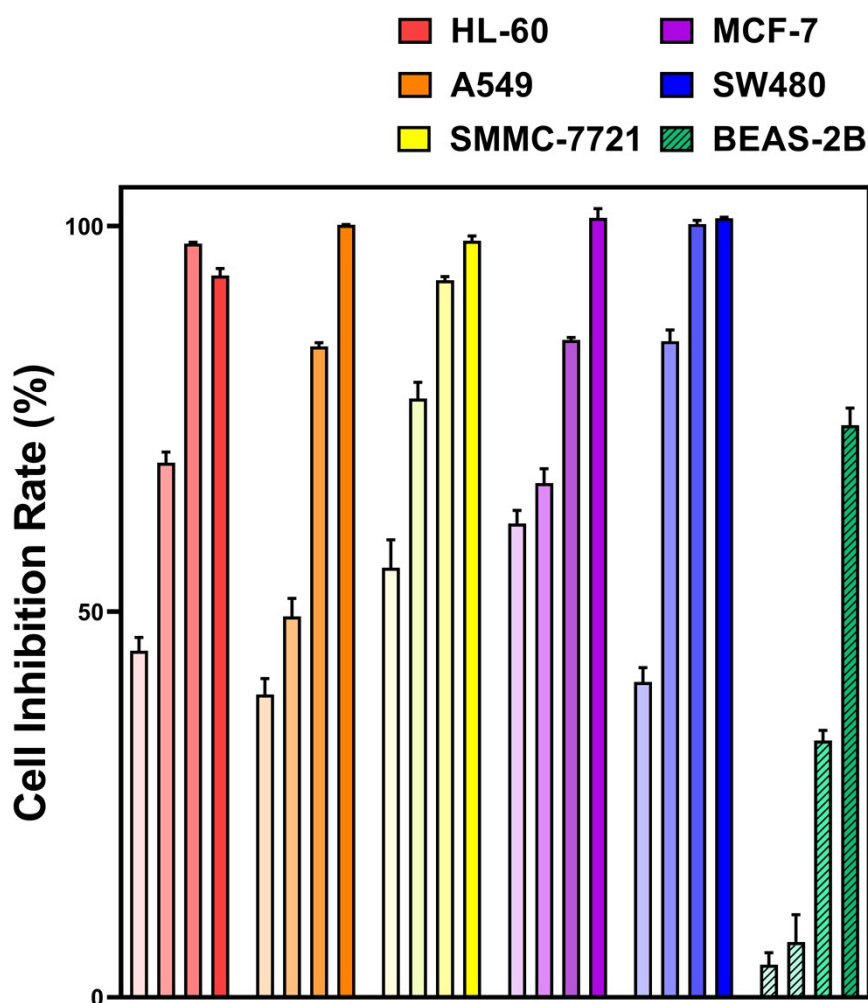

**Fig. S6.** Comparison of cell inhibition rates against five different tumor cells and BEAS-2B cells (concentration gradient from left to right: 1.25  $\mu$ M, 2.5  $\mu$ M, 5  $\mu$ M, 10  $\mu$ M).
